# Supplementary material
Source: Springer Nature journal article supplement (https://www.springermedizin.de/resource/supplementary/12902_2013_304_MOESM3_ESM.pdf/9515886)

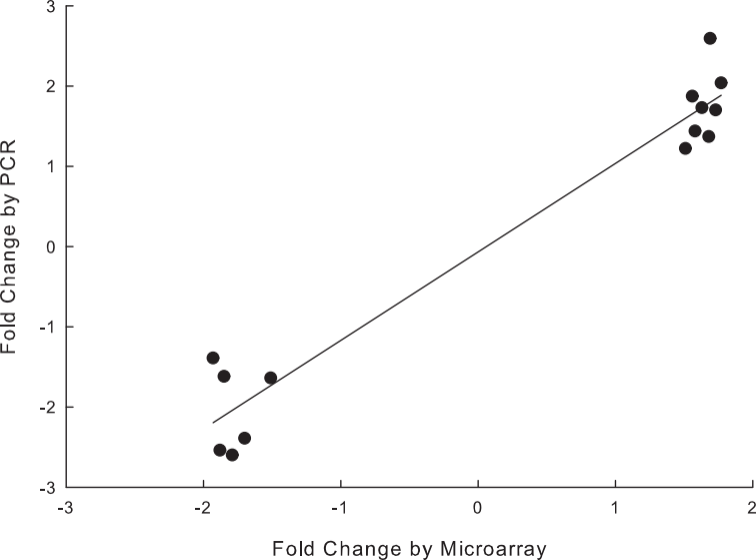

Supplement: MOESM3 [file 9515886]
